# Supplementary material for: Microbial biogeography of 925 geothermal springs in New Zealand
Source: PubMed Central journal article supplement (PMC6056493; doi:10.1038/s41467-018-05020-y), 2018-07-23
Supplement: 41467_2018_5020_MOESM1_ESM.pdf [file 41467_2018_5020_MOESM1_ESM.pdf]

# 1 **Microbial biogeography of 925 geothermal springs** 2 **in New Zealand**

3  
4 Jean F. Power<sup>1,2</sup>, Carlo R. Carere<sup>1,3</sup>, Charles K. Lee<sup>2</sup>, Georgia L.J. Wakerley<sup>2</sup>, David  
5 W. Evans<sup>1</sup>, Mathew Button<sup>4</sup>, Duncan White<sup>5</sup>, Melissa D. Climo<sup>5,6</sup>, Annika M. Hinze<sup>4</sup>,  
6 Xochitl C. Morgan<sup>7</sup>, Ian R. McDonald<sup>2</sup>, S. Craig Cary<sup>2\*</sup> and Matthew B. Stott<sup>1,6\*</sup>

7  
8 <sup>1</sup>Geomicrobiology Research Group, Department of Geothermal Sciences, GNS  
9 Science, Taupō 3384, New Zealand

10 <sup>2</sup>Thermophile Research Unit, School of Science, University of Waikato, Hamilton  
11 3240, New Zealand

12 <sup>3</sup>Department of Chemical and Process Engineering, University of Canterbury,  
13 Christchurch 8140, New Zealand

14 <sup>4</sup>Department of Computer Science, University of Waikato, Hamilton 3240, New  
15 Zealand

16 <sup>5</sup>Wairakei Research Centre, GNS Science, Taupō 3384, New Zealand

17 <sup>6</sup>School of Biological Sciences, University of Canterbury, Christchurch 8140, New  
18 Zealand

19 <sup>7</sup>Department of Microbiology and Immunology, University of Otago 9054, Dunedin,  
20 New Zealand

21  
22  
23 **\*Corresponding authors:** Dr Matthew Stott (matthew.stott@canterbury.ac.nz; +64  
24 (0)3 369 2511) and Prof. Craig Cary (caryc@waikato.ac.nz; +64 (0)7 838 4593)

## 25 26 27 **SUPPLEMENTARY METHODOLOGY**

### 28 29 **Field sampling**

30 Three litres of spring water were collected for each sample taken. A custom-made  
31 stainless-steel device was used to capture the water column of each feature to a  
32 depth of 1 m where possible, either at the centre of the spring or at ~3 m from the

33 edge for large features to target well-mixed and/or more representative samples,  
34 depending on safety and size of the spring (detailed sketches were drawn of each  
35 sampling location to facilitate replication). If the feature was on a slope or the safest  
36 sampling position was too far from the spring for the water sampler to operate  
37 correctly, a 500 mL PP Nalgene bottle (ThermoFisher Scientific, Waltham, MA, USA)  
38 was used to collect the water from the same part of the water column. Either this  
39 vessel or the water sampler were then used to aseptically fill a 2000 mL PP Nalgene  
40 bottle (ThermoFisher Scientific, Waltham, MA, USA) with spring water for  
41 subsequent filtering and DNA extraction. In addition, a 330 mL rubber-sealed glass  
42 bottle was collected for geochemical analyses and the 500 mL PP bottle was used to  
43 retain water for geophysical parameters. All vessels that contained a microbiological  
44 sample were subjected to the same stringent washing procedures, namely with  
45 detergent (Extran MA03, EMD Millipore, Billerica, MA, USA) and bleach (20 % v/v  
46 bleach:distilled water solution using 5 % sodium hypochlorite), followed by a final  
47 autoclave step (122 °C for 20 mins). All metadata were recorded on a custom-made  
48 application suitable for Android tablets. Metadata recorded *in situ* at the time of  
49 sampling included: sample number, sample date, feature name, feature type,  
50 location name, geothermal field, district, latitude and longitude coordinates, detailed  
51 description, ebullition, size, colour, spring temperature (same location as sample),  
52 and photographs/diagrams of the site. Spring temperature (TEMP) was measured *in*  
53 *situ* immediately after sampling. Parameters measured within two hours of sampling  
54 were pH, oxidation-reduction potential (ORP), conductivity (COND), dissolved  
55 oxygen (dO), turbidity (TURB), ferrous iron ( $\text{Fe}^{2+}$ ) concentration and filtered volume  
56 (more details are given in Sample Processing). Entries were digitally linked to the  
57 corresponding sample ID and automatically uploaded to an Amazon Relational  
58 Database Service (RDS) and E3 Bucket with structured query language (SQL).  
59 These results are visible on an Amazon EC2 Web Server, accessed through  
60 <http://1000springs.org.nz/>.

61

## 62 **Sample processing**

63 Within 2 hours of sampling, the contents of the 2000 mL Nalgene bottle were filtered  
64 through a Sterivex-GP 0.22 µm PES column filter (EMD Millipore, Billerica, MA,  
65 USA), using the Masterflex E/S Portable Sampler with a peristaltic L/S pump head  
66 and platinum-cured silicone L/S tubing (Cole-Parmer, Vernon Hills, IL, USA). All

67 tubing was bleached and rinsed (first with reverse-osmosis water followed by  
68 approximately 150 mL sample water) between samples. Each sample was filtered  
69 until all 2000 mL water was pushed through or the filter membrane became clogged.  
70 The filters were immediately cooled to 4 °C and then stored at -20 °C until DNA  
71 extraction. Filtrate from the column filter was used to fill three 50 mL tubes and two  
72 15 mL tubes with spring water for varying geochemical analyses (Supplementary  
73 Table 7). 80 µL of this filtrate was also added to 4 mL ferrous iron reagent (which  
74 includes 0.63 mM 2,2-bipyridyl, 0.80 M ammonium acetate and 3.7 % v/v glacial  
75 acetic acid)<sup>1</sup> for colorimetric spectroscopy. A multiparameter field meter (Hanna  
76 Instruments, Woonsocket, RI, USA) was used to measure pH, oxidation-reduction  
77 potential (ORP), conductivity (COND), turbidity (TURB), dissolved oxygen (dO) and  
78 sample temperature from the air-tight 500 mL vessel (after samples had cooled to  
79 below room temperature). Where pH measured less than 1, a benchtop pH meter  
80 (Hanna Instruments, Woonsocket, RI, USA) calibrated to pH 0 was used. All  
81 geochemical sample vessels were then stored at either 4 °C or -20 °C until analyses  
82 were performed. Aqueous metals and non-metals measured by ICP-MS were Ag, Al,  
83 As, B, Ba, Br, Ca, Cd, Co, Cr, Cs, Cu, Fe, Hg, K, Li, Mg, Mn, Mo, Na, Ni, Pb, Rb, S, Se, Si,  
84 Sr, Tl, U, V and Zn. Chemical analyses were performed at the Geomicrobiology  
85 Research Group (GRG) and the New Zealand Geothermal Analytical Laboratory  
86 (NZGAL), both at GNS Science in Wairakei, New Zealand and at the School of  
87 Science, University of Waikato, Hamilton, New Zealand. All samples and analyses  
88 are summarised in Supplementary Table 7.

89

## 90 **DNA extraction**

91 DNA extraction, amplification and sequencing were performed at the Thermophile  
92 Research Unit and DNA Sequencing Facility (University of Waikato, Hamilton, New  
93 Zealand) from a modified cetyl trimethylammonium bromide (CTAB) method<sup>2</sup>.  
94 Column filters were thawed, 500 µL of a 0.8 % w/v skim milk powder solution (local  
95 consumer brand, freshly prepared for each batch of extractions and treated with UV  
96 light for 20 min) added and mixed at 150 RPM on a Ratek orbital mixer at 65 °C for  
97 15 mins. A buffer containing CTAB was used in the extraction lysis buffer which  
98 consisted of 2 % (v/v) cetyl trimethylammonium bromide, 1 % (v/v) polyvinyl  
99 pyrrolidone, 100 mM Tris-HCl, 1.4 M NaCl and 20 mM EDTA. The final extraction

100 buffer contained 400  $\mu$ L CTAB buffer, 200  $\mu$ L PBS (100 mM) and 100  $\mu$ L SDS (10  
101 %). This was added to the filters which were then mixed at 150 RPM at 65 °C for 45  
102 mins. The extraction buffer was pushed through the filter and collected. A further 0.7  
103 mL CTAB buffer was added to the filters and mixed at 150 RPM for 15 mins. This  
104 filtrate was added to a separate tube, resulting in two extraction duplicates.  
105 Chloroform:isoamyl alcohol (24:1), in equal volumes (1:1) to the filtrate, was added  
106 to each duplicate and vortexed. These were centrifuged at 10,000 RCF for 12 mins  
107 at 4 °C. The aqueous top layers were transferred to new tubes, and 300  $\mu$ L of  
108 chloroform:isoamyl (24:1) added. Again, these were vortexed and centrifuged at  
109 10,000 RCF for 12 mins at 4 °C. The aqueous top layers were removed to fresh  
110 tubes. The subsequent steps were modified from the PowerMag Microbial DNA  
111 Isolation Kit using SwiftMag technology (MoBio Laboratories, Carlsbad, CA, USA).  
112 Equal volumes of 100 % molecular grade ethanol and SwiftMag beads (22:22  $\mu$ L)  
113 were added to the aqueous phases and placed on a magnetic stand for 2 mins. The  
114 supernatants were removed and the beads washed with 1 mL of 100 % ethanol. The  
115 beads were then resuspended in 22  $\mu$ L 1X TE (10 mM Tris-HCL containing 1 mM  
116 EDTA, pH 8.0). Using a magnet to retain the beads, resuspended DNA were  
117 collected, pooled and quantified using the Qubit dsDNA HS assay (ThermoFisher  
118 Scientific, Waltham, MA, USA). DNA was then either stored at 4 °C for subsequent  
119 PCR that day or at -20 °C for extended periods of time.

120

### 121 **DNA amplification**

122 PCR reactions were done in triplicate and each final concentration contained: 0.2  $\mu$ M  
123 of forward and reverse primers, 0.016  $\mu$ g/ $\mu$ L BSA, 0.24 mM of each dNTP, 1.2 X  
124 PCR buffer, 6 mM MgCl<sub>2</sub>, 0.6 U TAQ polymerase and 0.5 ng of DNA to a final  
125 volume of 25  $\mu$ L. Prior to the addition of primers, TAQ polymerase and DNA, the  
126 PCR master mix was treated with ethidium monoazide bromide (1 mg/mL stock) to  
127 remove exogenous DNA in the PCR reagents<sup>3</sup>. The amount of ethidium monoazide  
128 bromide added varied for each batch of the reagent made. This was determined by  
129 serial dilution and the resultant highest concentration that did not inhibit PCR (a  
130 1/100 dilution was typical). The master mix was then incubated on ice for 1 min in  
131 darkness, followed by 1 min photoactivation using a halogen lamp. All PCR reagents  
132 were supplied by Life Technologies (ThermoFisher Scientific, Waltham, MA, USA),  
133 except for ethidium monazide bromide (Mediray, Auckland, New Zealand). The

134 following PCR thermocycling parameters were performed: initial 3 min at 97 °C  
135 denaturation, 30 cycles of 45 sec at 94 °C, 60 sec at 50 °C and 90 sec at 72 °C,  
136 followed by a final 10 min incubation at 72 °C.

137

138 The triplicate amplicons were pooled and purified using SPRIselect (Beckman  
139 Coulter, Brea, CA, USA) as per the manufacturer's instructions (recommended ratio  
140 of 0.8X SPRI to amplicon volume). Quality and final concentration of the libraries  
141 were verified and adjusted to 12 pM via HS Qubit 2.0 (ThermoFisher Scientific,  
142 Waltham, MA, USA) and 9100 BioAnalyser (Agilent Technologies, Santa Clara, CA,  
143 USA). Amplicon sequencing was then performed using the Ion PGM System for  
144 Next-Generation Sequencing (ThermoFisher Scientific, Waltham, MA, USA) with the  
145 Ion 318 Chip Kit v2 and 400-base read length chemistry.

146

#### 147 **Sample filtering for spatial analyses**

148 A total of 1,019 samples were taken from 18 different geothermal fields across the  
149 entire TVZ for this study from July 2013 to April 2015 (Fig. 1). Twenty-eight of these  
150 produced insufficient DNA yields for sequencing. Twenty-two failed to generate  
151 adequate sequence reads for downstream processing (< 9,500 reads). Twenty-one  
152 geothermal springs were also sampled over time for future investigation of temporal  
153 variation ( $n = 66$ ). Forty-four temporal repeats (excluding one already removed due  
154 to low sequence reads) were therefore removed from the dataset, leaving a final 925  
155 individual geothermal springs for spatial statistical analyses. This also removed all  
156 springs sampled from the geothermal field Atiamuri, which left a final number of 17  
157 individual fields analysed.

158

#### 159 **Geochemical filtering**

160 To build the constrained correspondence analysis (CCA) model, the 46  
161 physicochemical variables measured physicochemistry had to be reduced to a  
162 tractable number. Mantel testing of all variables against Bray-Curtis similarities  
163 calculated showed significant correlations (Supplementary Table 3). In order of  
164 highest to lowest mantel statistic, the variables were added to a permutational  
165 multivariate analysis of variance (the adonis function in the vegan package in R). pH  
166 and temperature had the highest contributions to this model (12.4 and 3.9 %

167 respectively,  $P < 0.001$ , Supplementary Table 4). Manganese, caesium, cadmium,  
168 selenium, cobalt, iron, zinc, barium, chromium, calcium and nickel had a  $P$ -value  
169 greater than 0.01 and were removed. Collinear variables were identified in the  
170 remaining set (Pearson's coefficient:  $|r| > 0.7$ ) and group representatives with the  
171 highest mantel statistic with beta diversity were chosen. This removed rubidium,  
172 potassium, vanadium, mercury, sodium, boron, bromine, sulfur, chloride and ferrous  
173 iron. The model was re-run on remaining variables and subsequently, magnesium  
174 was removed ( $P = 0.062$ ). Of the 24 variables that remained, those with low variation  
175 (standard deviation  $< 0.25$  ppm) were removed (Supplementary Table 5) – this  
176 included strontium, copper, lead, nitrite, molybdenum, thallium, silver and uranium.  
177 The remaining 15 variables were added to the CCA model, with geothermal fields  
178 and spring communities (Fig. 3). Two springs also had to be removed from this  
179 model due to insufficient chemical analyses ( $n = 923$ ).

180

### 181 **Supplementary References**

- 182 1. Wilson, A. D. The micro-determination of ferrous iron in silicate minerals by a  
183 volumetric and a colorimetric method. *Analyst* **85**, 823–827 (1960).
- 184 2. Archer, S. D. J., McDonald, I. R., Herbold, C. W. & Cary, S. C.  
185 Characterisation of bacterioplankton communities in the meltwater ponds of  
186 Bratina Island, Victoria Land, Antarctica. *FEMS Microbiol. Ecol.* **89**, 451–464  
187 (2014).
- 188 3. Rueckert, A. & Morgan, H. W. Removal of contaminating DNA from  
189 polymerase chain reaction using ethidium monoazide. *J. Microbiol. Methods*  
190 **68**, 596–600 (2007).

191

## SUPPLEMENTARY TABLES

**Supplementary Table 1** | Linear regression of physicochemistry individually against alpha diversity using the Shannon diversity index.

|                               | Slope     | Std. Error | t-value | P-value  | Signif. Codes | R <sup>2</sup> |
|-------------------------------|-----------|------------|---------|----------|---------------|----------------|
| pH                            | 0.1574    | 0.0117     | 13.480  | < 0.0001 | ***           | 0.164          |
| NO <sub>3</sub> <sup>-</sup>  | 0.8205    | 0.0834     | 9.838   | < 0.0001 | ***           | 0.095          |
| SO <sub>4</sub> <sup>2-</sup> | -0.0003   | 0.0000     | -6.620  | < 0.0001 | ***           | 0.045          |
| TURB                          | -0.0009   | 0.0001     | -6.382  | < 0.0001 | ***           | 0.042          |
| H <sub>2</sub> S              | -0.0140   | 0.0026     | -5.304  | < 0.0001 | ***           | 0.030          |
| Al                            | -0.0049   | 0.0010     | -5.100  | < 0.0001 | ***           | 0.027          |
| dO                            | 0.0727    | 0.0148     | 4.899   | < 0.0001 | ***           | 0.025          |
| S                             | -0.0006   | 0.0001     | -4.675  | < 0.0001 | ***           | 0.023          |
| U                             | -350.7932 | 76.2842    | -4.599  | < 0.0001 | ***           | 0.022          |
| HCO <sub>3</sub> <sup>-</sup> | 0.0011    | 0.0003     | 4.229   | < 0.0001 | ***           | 0.019          |
| Li                            | 0.0321    | 0.0080     | 4.009   | < 0.0001 | ***           | 0.017          |
| Na                            | 0.0004    | 0.0001     | 3.887   | < 0.0001 | ***           | 0.016          |
| As                            | 0.0627    | 0.0195     | 3.216   | 0.0013   | **            | 0.011          |
| Cs                            | 0.1131    | 0.0373     | 3.030   | 0.0025   | **            | 0.010          |
| K                             | 0.0020    | 0.0007     | 2.831   | 0.0047   | **            | 0.009          |
| Br                            | 0.0355    | 0.0133     | 2.664   | 0.0079   | **            | 0.008          |
| Se                            | 14.3009   | 5.4569     | 2.621   | 0.0089   | **            | 0.007          |
| ORP                           | -0.0005   | 0.0002     | -2.596  | 0.0096   | **            | 0.007          |
| NH <sub>4</sub> <sup>+</sup>  | -0.0014   | 0.0005     | -2.594  | 0.0096   | **            | 0.007          |
| Rb                            | 0.1298    | 0.0534     | 2.429   | 0.0153   | *             | 0.006          |
| Fe                            | -0.0027   | 0.0012     | -2.319  | 0.0206   | *             | 0.006          |
| Fe <sup>2+</sup>              | -0.0023   | 0.0010     | -2.317  | 0.0207   | *             | 0.006          |
| NO <sub>2</sub> <sup>-</sup>  | 0.9100    | 0.4052     | 2.246   | 0.0250   | *             | 0.005          |
| B                             | 0.0051    | 0.0023     | 2.188   | 0.0289   | *             | 0.005          |
| Mn                            | -0.0555   | 0.0297     | -1.870  | 0.0619   | .             | 0.004          |
| V                             | -0.6407   | 0.3791     | -1.690  | 0.0913   | .             | 0.003          |
| Si                            | -0.0010   | 0.0006     | -1.656  | 0.0980   | .             | 0.003          |
| Cd                            | 36.1309   | 23.0894    | 1.565   | 0.1180   | .             | 0.003          |
| Co                            | -9.3257   | 6.3612     | -1.466  | 0.1430   | .             | 0.002          |
| Cr                            | -0.2915   | 0.2145     | -1.359  | 0.1740   | .             | 0.002          |
| TEMP                          | 0.0018    | 0.0014     | 1.279   | 0.2010   | .             | 0.002          |
| Ca                            | -0.0005   | 0.0004     | -1.175  | 0.2400   | .             | 0.001          |
| Ni                            | -1.0608   | 0.9284     | -1.143  | 0.2540   | .             | 0.001          |

|                               |          |         |        |        |       |
|-------------------------------|----------|---------|--------|--------|-------|
| Mo                            | 2.7628   | 2.4559  | 1.125  | 0.2610 | 0.001 |
| COND                          | 0.0000   | 0.0000  | -1.098 | 0.2720 | 0.001 |
| Hg                            | -2.3407  | 2.1961  | -1.066 | 0.2870 | 0.001 |
| Mg                            | -0.0009  | 0.0008  | -1.022 | 0.3070 | 0.001 |
| Ba                            | -0.0648  | 0.0639  | -1.015 | 0.3100 | 0.001 |
| Ag                            | -43.2878 | 47.1283 | -0.919 | 0.3590 | 0.001 |
| Zn                            | -0.1021  | 0.1115  | -0.916 | 0.3600 | 0.001 |
| Cl <sup>-</sup>               | 0.0000   | 0.0000  | -0.700 | 0.4840 | 0.001 |
| Tl                            | 5.0194   | 7.6863  | 0.653  | 0.5140 | 0.000 |
| PO <sub>4</sub> <sup>3-</sup> | 0.0269   | 0.1135  | 0.237  | 0.8130 | 0.000 |
| Pb                            | -0.0390  | 0.3551  | -0.110 | 0.9130 | 0.000 |
| Sr                            | 0.0100   | 0.1433  | 0.070  | 0.9440 | 0.000 |
| Cu                            | 0.0149   | 0.2460  | 0.060  | 0.9520 | 0.000 |

Signif. codes: 0-0.001 '\*\*\*'; 0.001-0.01 '\*\*'; 0.01-0.05 '\*'; 0.05-0.1 '.'; 0.1-1 ''

TURB: turbidity, dO: dissolved oxygen, ORP: oxidation-reduction potential, COND: conductivity

**Supplementary Table 2 | Multiple linear regression model of significant physicochemical parameters against alpha diversity (Shannon Index), after collinear variables were removed and an Akaike information criterion (AIC) was applied. Variables were added to the model in order of highest to lowest best fit from singular linear regression.**

|                              | Estimate | Std. Error | t-value | P-value  | Signif. codes |
|------------------------------|----------|------------|---------|----------|---------------|
| (Intercept)                  | 2.7116   | 0.1107     | 24.502  | < 0.0001 | ***           |
| pH                           | 0.1568   | 0.0140     | 11.201  | < 0.0001 | ***           |
| NO <sub>3</sub> <sup>-</sup> | 0.7690   | 0.0905     | 8.502   | < 0.0001 | ***           |
| TURB                         | -0.0002  | 0.0001     | -1.768  | 0.0774   | .             |
| dO                           | 0.0498   | 0.0131     | 3.807   | 0.0002   | ***           |
| ORP                          | 0.0004   | 0.0002     | 2.219   | 0.0268   | *             |
| NO <sub>2</sub> <sup>-</sup> | -1.6099  | 0.4104     | -3.923  | 0.0001   | ***           |
| Si                           | -0.0014  | 0.0005     | -2.689  | 0.0073   | **            |
| Cd                           | 48.7715  | 19.8181    | 2.461   | 0.0140   | *             |

Multiple R-squared: 0.273, adjusted R-squared: 0.2666

F-statistic: 42.99 on 8 and 916 degrees of freedom, p-value: < 2.2e-16

Signif. codes: 0-0.001 '\*\*\*'; 0.001-0.01 '\*\*'; 0.01-0.05 '\*'; 0.05-0.1 '.'; 0.1-1 ''

TURB: turbidity, dO: dissolved oxygen



**Supplementary Table 3** | Mantel tests using Spearman's correlation (permutations = 999) of Bray-Curtis dissimilarities between all communities sampled and each individual geochemical parameter and geographic distance (km).

|                               | <b>Rho (<math>\rho</math>)</b> | <b>P-value</b> | <b>Signif. codes</b> |
|-------------------------------|--------------------------------|----------------|----------------------|
| pH                            | 0.544                          | < 0.001        | ***                  |
| SO <sub>4</sub> <sup>2-</sup> | 0.248                          | < 0.001        | ***                  |
| Al                            | 0.224                          | < 0.001        | ***                  |
| TEMP                          | 0.193                          | < 0.001        | ***                  |
| HCO <sub>3</sub> <sup>-</sup> | 0.153                          | < 0.001        | ***                  |
| TURB                          | 0.145                          | < 0.001        | ***                  |
| S                             | 0.131                          | < 0.001        | ***                  |
| km                            | 0.122                          | < 0.001        | ***                  |
| NH <sub>4</sub> <sup>+</sup>  | 0.103                          | < 0.001        | ***                  |
| As                            | 0.102                          | < 0.001        | ***                  |
| COND                          | 0.098                          | < 0.001        | ***                  |
| Mo                            | 0.086                          | < 0.001        | ***                  |
| Fe                            | 0.082                          | < 0.001        | ***                  |
| Li                            | 0.082                          | < 0.001        | ***                  |
| Ag                            | 0.079                          | < 0.001        | ***                  |
| Tl                            | 0.074                          | < 0.001        | ***                  |
| NO <sub>2</sub> <sup>-</sup>  | 0.073                          | < 0.001        | ***                  |
| V                             | 0.072                          | < 0.001        | ***                  |
| U                             | 0.069                          | < 0.001        | ***                  |
| Rb                            | 0.068                          | < 0.001        | ***                  |
| Na                            | 0.068                          | < 0.001        | ***                  |
| Cs                            | 0.064                          | < 0.001        | ***                  |
| Mn                            | 0.063                          | < 0.001        | ***                  |
| B                             | 0.059                          | < 0.001        | ***                  |
| K                             | 0.058                          | < 0.001        | ***                  |
| Mg                            | 0.057                          | < 0.001        | ***                  |
| ORP                           | 0.057                          | < 0.001        | ***                  |
| Cl <sup>-</sup>               | 0.056                          | < 0.001        | ***                  |
| Fe <sup>2+</sup>              | 0.056                          | < 0.001        | ***                  |
| Hg                            | 0.055                          | < 0.001        | ***                  |
| NO <sub>3</sub> <sup>-</sup>  | 0.055                          | < 0.001        | ***                  |
| Si                            | 0.046                          | < 0.001        | ***                  |
| Sr                            | 0.044                          | < 0.001        | ***                  |
| Co                            | 0.040                          | 0.002          | **                   |

|                               |        |         |     |
|-------------------------------|--------|---------|-----|
| Br                            | 0.038  | 0.002   | **  |
| Zn                            | 0.044  | < 0.001 | *** |
| dO                            | 0.041  | < 0.001 | *** |
| Se                            | 0.031  | 0.003   | **  |
| Ca                            | 0.029  | 0.007   | **  |
| Ba                            | 0.020  | 0.017   | *   |
| Cd                            | 0.020  | 0.068   | .   |
| H <sub>2</sub> S              | 0.014  | 0.142   |     |
| Cr                            | 0.007  | 0.276   |     |
| Pb                            | 0.006  | 0.297   |     |
| PO <sub>4</sub> <sup>3-</sup> | 0.005  | 0.344   |     |
| Cu                            | -0.008 | 0.736   |     |
| Ni                            | -0.020 | 0.953   |     |

Signif. codes: 0-0.001 '\*\*\*'; 0.001-0.01 '\*\*'; 0.01-0.05 '\*'; 0.05-0.1 '.'; 0.1-1 ''

TEMP: temperature, TURB: turbidity, km: kilometres, COND: conductivity, dO: dissolved oxygen, ORP: oxidation reduction potential

**Supplementary Table 4 |** Permutational multivariate analysis of variance (using continuous variables only) of beta diversity using Bray-Curtis dissimilarities.

|                               | Df | SumsOfSqs | MeanSqs | F.Model | R <sup>2</sup> | P-value | Signif. codes |
|-------------------------------|----|-----------|---------|---------|----------------|---------|---------------|
| pH                            | 1  | 44.13     | 44.125  | 154.945 | 0.124          | 0.001   | ***           |
| TEMP                          | 1  | 14.03     | 14.026  | 49.253  | 0.039          | 0.001   | ***           |
| ORP                           | 1  | 5.06      | 5.056   | 17.755  | 0.014          | 0.001   | ***           |
| SO <sub>4</sub> <sup>2-</sup> | 1  | 2.88      | 2.883   | 10.123  | 0.008          | 0.001   | ***           |
| TURB                          | 1  | 2.71      | 2.708   | 9.508   | 0.008          | 0.001   | ***           |
| As                            | 1  | 2.51      | 2.512   | 8.820   | 0.007          | 0.001   | ***           |
| NO <sub>3</sub> <sup>-</sup>  | 1  | 2.25      | 2.249   | 7.896   | 0.006          | 0.001   | ***           |
| NH <sub>4</sub> <sup>+</sup>  | 1  | 1.99      | 1.989   | 6.986   | 0.006          | 0.001   | ***           |
| HCO <sub>3</sub> <sup>-</sup> | 1  | 1.84      | 1.839   | 6.457   | 0.005          | 0.001   | ***           |
| Rb                            | 1  | 1.76      | 1.757   | 6.169   | 0.005          | 0.001   | ***           |
| Ag                            | 1  | 1.39      | 1.389   | 4.877   | 0.004          | 0.001   | ***           |
| NO <sub>2</sub> <sup>-</sup>  | 1  | 1.25      | 1.254   | 4.405   | 0.004          | 0.001   | ***           |
| K                             | 1  | 1.22      | 1.223   | 4.294   | 0.003          | 0.001   | ***           |
| COND                          | 1  | 1.14      | 1.143   | 4.014   | 0.003          | 0.001   | ***           |
| dO                            | 1  | 1.10      | 1.096   | 3.848   | 0.003          | 0.001   | ***           |
| H <sub>2</sub> S              | 1  | 1.00      | 1.001   | 3.514   | 0.003          | 0.001   | ***           |

|                               |   |      |       |       |       |       |     |
|-------------------------------|---|------|-------|-------|-------|-------|-----|
| Tl                            | 1 | 1.00 | 0.998 | 3.506 | 0.003 | 0.001 | *** |
| V                             | 1 | 0.96 | 0.959 | 3.369 | 0.003 | 0.001 | *** |
| Mg                            | 1 | 0.88 | 0.880 | 3.090 | 0.002 | 0.001 | *** |
| Al                            | 1 | 0.84 | 0.838 | 2.942 | 0.002 | 0.001 | *** |
| Si                            | 1 | 0.83 | 0.830 | 2.916 | 0.002 | 0.001 | *** |
| Sr                            | 1 | 0.75 | 0.753 | 2.643 | 0.002 | 0.001 | *** |
| Hg                            | 1 | 0.72 | 0.718 | 2.522 | 0.002 | 0.001 | *** |
| Mo                            | 1 | 0.64 | 0.640 | 2.247 | 0.002 | 0.001 | *** |
| Pb                            | 1 | 0.56 | 0.565 | 1.984 | 0.002 | 0.001 | *** |
| Na                            | 1 | 1.02 | 1.020 | 3.582 | 0.003 | 0.002 | **  |
| B                             | 1 | 0.95 | 0.945 | 3.320 | 0.003 | 0.002 | **  |
| Br                            | 1 | 0.88 | 0.880 | 3.089 | 0.002 | 0.002 | **  |
| Li                            | 1 | 0.87 | 0.866 | 3.041 | 0.002 | 0.002 | **  |
| PO <sub>4</sub> <sup>3-</sup> | 1 | 0.65 | 0.653 | 2.292 | 0.002 | 0.002 | **  |
| Cu                            | 1 | 0.61 | 0.612 | 2.149 | 0.002 | 0.002 | **  |
| U                             | 1 | 0.74 | 0.744 | 2.613 | 0.002 | 0.003 | **  |
| S                             | 1 | 0.83 | 0.827 | 2.903 | 0.002 | 0.004 | **  |
| Cl <sup>-</sup>               | 1 | 0.75 | 0.748 | 2.628 | 0.002 | 0.005 | **  |
| Fe <sup>2+</sup>              | 1 | 0.57 | 0.568 | 1.995 | 0.002 | 0.005 | **  |
| Mn                            | 1 | 0.58 | 0.581 | 2.040 | 0.002 | 0.011 | *   |
| Cs                            | 1 | 0.59 | 0.592 | 2.078 | 0.002 | 0.014 | *   |
| Cd                            | 1 | 0.39 | 0.394 | 1.384 | 0.001 | 0.019 | *   |
| Se                            | 1 | 0.47 | 0.473 | 1.660 | 0.001 | 0.055 | .   |
| Co                            | 1 | 0.38 | 0.379 | 1.329 | 0.001 | 0.142 |     |
| Fe                            | 1 | 0.36 | 0.357 | 1.255 | 0.001 | 0.145 |     |
| Zn                            | 1 | 0.37 | 0.367 | 1.289 | 0.001 | 0.146 |     |
| Ba                            | 1 | 0.37 | 0.369 | 1.296 | 0.001 | 0.172 |     |
| Cr                            | 1 | 0.35 | 0.355 | 1.247 | 0.001 | 0.187 |     |
| Ca                            | 1 | 0.34 | 0.344 | 1.209 | 0.001 | 0.225 |     |
| Ni                            | 1 | 0.23 | 0.227 | 0.797 | 0.001 | 0.758 |     |

Signif. codes: 0-0.001 '\*\*\*'; 0.001-0.01 '\*\*'; 0.01-0.05 '\*'; 0.05-0.1 '.'; 0.1-1 ''

TURB: turbidity, dO: dissolved oxygen, ORP: oxidation-reduction potential, COND: conductivity

**Supplementary Table 5** | Variance and standard deviation (SD) of significant chemistry (ppm) correlating with beta diversity. Parameters with SD < 0.25 ppm were removed for building the constrained correspondence analysis (CCA) model with a tractable number of variables.

|                               | Variance ( $\sigma^2$ ) | SD (ppm) |
|-------------------------------|-------------------------|----------|
| SO <sub>4</sub> <sup>2-</sup> | 404969.24               | 636.37   |
| HCO <sub>3</sub> <sup>-</sup> | 15489.52                | 124.46   |
| NH <sub>4</sub> <sup>+</sup>  | 3417.50                 | 58.46    |
| Si                            | 2945.29                 | 54.27    |
| Al                            | 452.90                  | 21.28    |
| H <sub>2</sub> S              | 141.45                  | 11.89    |
| Li                            | 15.49                   | 3.94     |
| As                            | 2.58                    | 1.61     |
| NO <sub>3</sub> <sup>-</sup>  | 0.13                    | 0.36     |
| PO <sub>4</sub> <sup>3+</sup> | 0.08                    | 0.28     |
| Sr                            | 0.04                    | 0.20     |
| Cu                            | 0.02                    | 0.13     |
| Pb                            | 0.01                    | 0.09     |
| NO <sub>2</sub> <sup>-</sup>  | 0.01                    | 0.08     |
| Mo                            | 0.00                    | 0.01     |
| Tl                            | 0.00                    | 0.00     |
| Ag                            | 0.00                    | 0.00     |
| U                             | 0.00                    | 0.00     |

**Supplementary Table 6** | Linear regression of spring community dissimilarity in each geothermal field against geographic distance. Geothermal fields Whangairorohea, Ohaaki and Misc were removed from this analysis due to low spring numbers present ( $n < 3$ ). Fields are ordered north to south.

|              | Slope  | Std. Error | t-value | P-value  | Signif. Codes | R <sup>2</sup> |
|--------------|--------|------------|---------|----------|---------------|----------------|
| White Island | 0.0003 | 0.0001     | 2.925   | 0.0042   | **            | 0.077          |
| Taheke       | 0.0003 | 0.0003     | 0.995   | 0.3490   |               | 0.110          |
| Tikitere     | 0.0000 | 0.0000     | 2.570   | 0.0102   | *             | 0.002          |
| Rotorua      | 0.0000 | 0.0000     | 25.850  | < 0.0001 | ***           | 0.010          |
| Waimangu     | 0.0000 | 0.0000     | 1.858   | 0.0632   | .             | 0.001          |
| Waikite      | 0.0001 | 0.0000     | 4.389   | 0.0000   | ***           | 0.046          |

|                  |        |        |        |          |     |       |
|------------------|--------|--------|--------|----------|-----|-------|
| Waiotapu         | 0.0000 | 0.0000 | 10.110 | < 0.0001 | *** | 0.040 |
| Te Kopia         | 0.0000 | 0.0001 | -0.117 | 0.9070   |     | 0.000 |
| Reporoa          | 0.0000 | 0.0000 | 6.541  | 0.0000   | *** | 0.096 |
| Orakei Korako    | 0.0001 | 0.0001 | 1.686  | 0.0929   | .   | 0.010 |
| Ngatamariki      | 0.0001 | 0.0001 | 2.566  | 0.0111   | *   | 0.035 |
| Rotokawa         | 0.0001 | 0.0000 | 9.565  | < 0.0001 | *** | 0.041 |
| Wairakei-Tauhara | 0.0000 | 0.0000 | 21.200 | < 0.0001 | *** | 0.153 |
| Tokaanu          | 0.0005 | 0.0000 | 12.280 | < 0.0001 | *** | 0.185 |

Signif. codes: 0-0.001 '\*\*\*'; 0.001-0.01 '\*\*'; 0.01-0.05 '\*'; 0.05-0.1 '.'; 0.1-1 ''

**Supplementary Table 7** | A list of all DNA and physicochemical samples taken from each spring, and the subsequent processing and analyses performed for each individual parameter.

| Parameter                                                                                                                  | Volume (mL) | Processing          | Storage               | Analytical Method           |
|----------------------------------------------------------------------------------------------------------------------------|-------------|---------------------|-----------------------|-----------------------------|
| Microbial diversity                                                                                                        | 2,000       | Filtered            | -20 °C                | DNA extraction, sequencing  |
| Temperature                                                                                                                | NA          | Raw                 | NA ( <i>in situ</i> ) | Digital thermocouple        |
| *Physical properties                                                                                                       | 500         | Raw                 | RT                    | Multiparameter field meter  |
| Fe <sup>2+</sup>                                                                                                           | 0.08        | Filtered            | RT                    | Colorimetric spectroscopy   |
| H <sub>2</sub> S                                                                                                           | 330         | Raw                 | 4 °C                  | Iodometric titration        |
| HCO <sub>3</sub> <sup>-</sup>                                                                                              | 330         | Raw                 | 4 °C                  | HCO <sub>3</sub> titration  |
| Cl <sup>-</sup>                                                                                                            | 330         | Raw                 | 4 °C                  | Potentiometric titration/IC |
| SO <sub>4</sub> <sup>2-</sup>                                                                                              | 50          | Filtered            | 4 °C                  | IC                          |
| NH <sub>4</sub> <sup>+</sup> , PO <sub>4</sub> <sup>3-</sup> , NO <sub>2</sub> <sup>-</sup> , NO <sub>3</sub> <sup>-</sup> | 50          | Filtered            | -20 °C                | FIA                         |
| Back up sample                                                                                                             | 50          | Filtered            | 4 °C                  | NA                          |
| **Elemental analysis                                                                                                       | 15          | Filtered, acidified | 4 °C                  | ICP-MS                      |

**NA:** not applicable, **RT:** room temperature, **IC:** ion chromatography, **FIA:** flow injection analysis, **ICP-MS:** inductively coupled plasma-mass spectroscopy.

\*Physical properties measured by the field meter were pH, oxidation-reduction potential (ORP), conductivity (COND), turbidity (TURB) and dissolved oxygen (dO)

\*\*Elements measured using ICP-MS were Al, Ag, As, B, Ba, Br, Ca, Cd, Co, Cr, Cu, Cs, Fe, Hg, K, Li, Mg, Mo, Mn, Na, Ni, Pb, Rb, S, Se, Si, Sr, Tl, U, V and Zn.

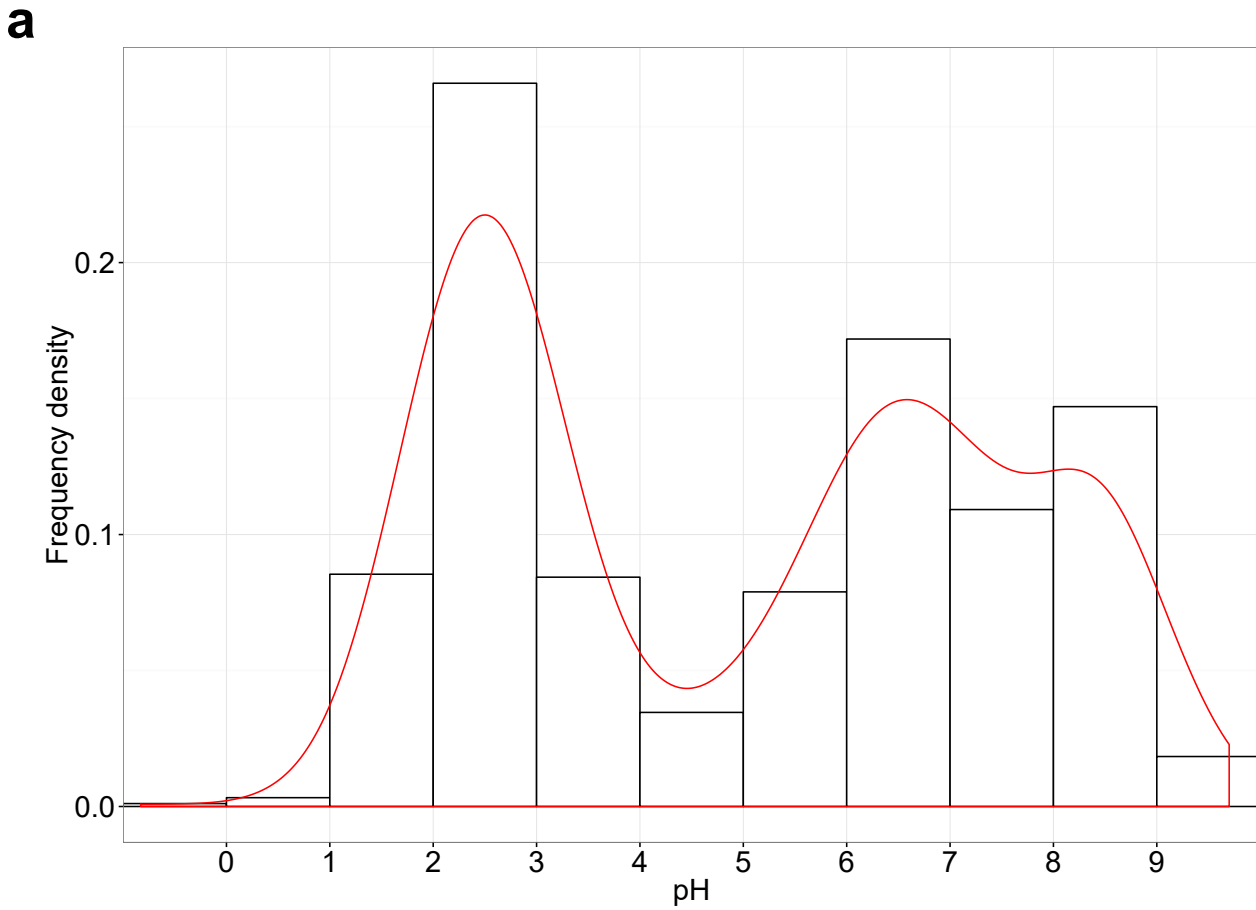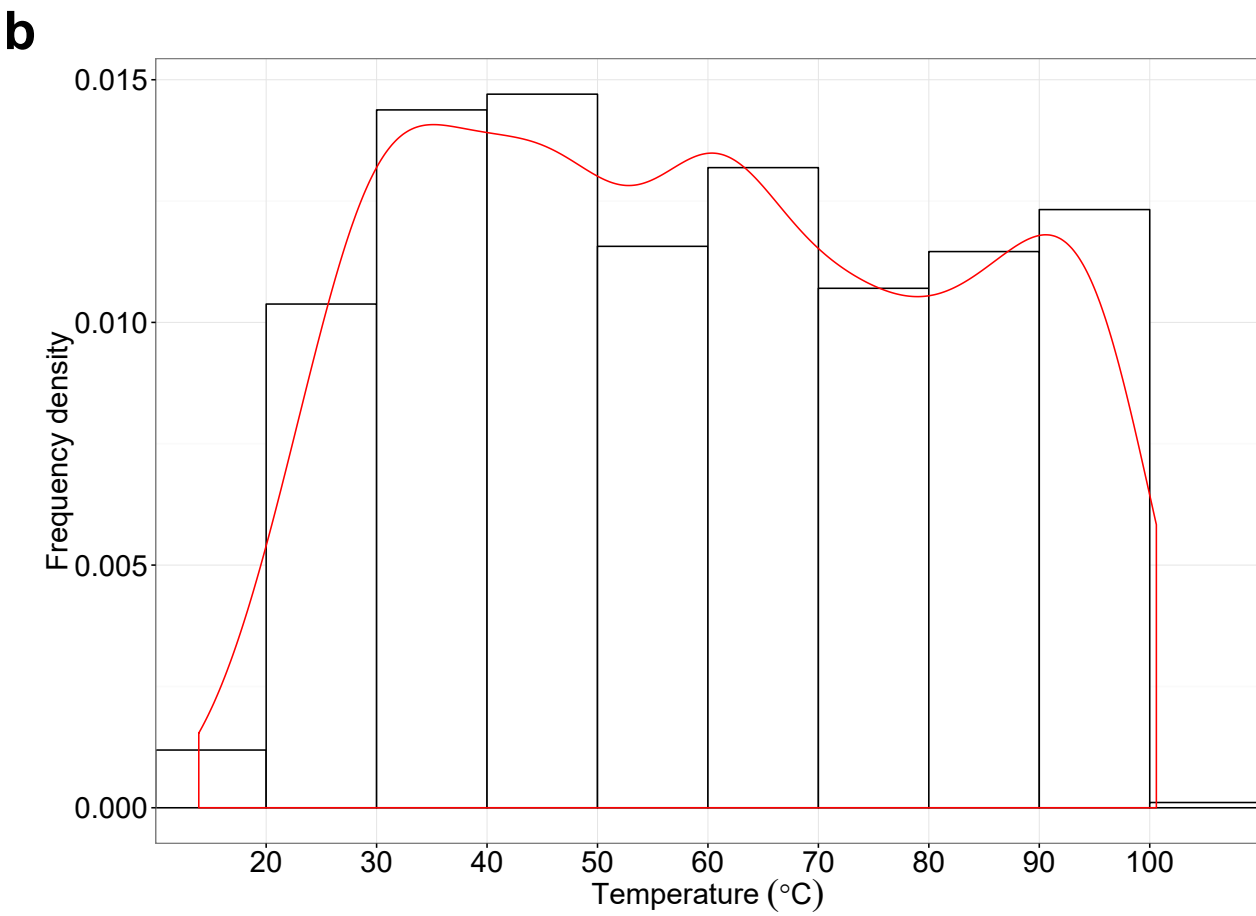

**Supplementary Fig. 1 | pH (a) and temperature (b) frequencies from all spring communities sampled. Red trendlines are a function of frequency density ( $n = 925$ ).**

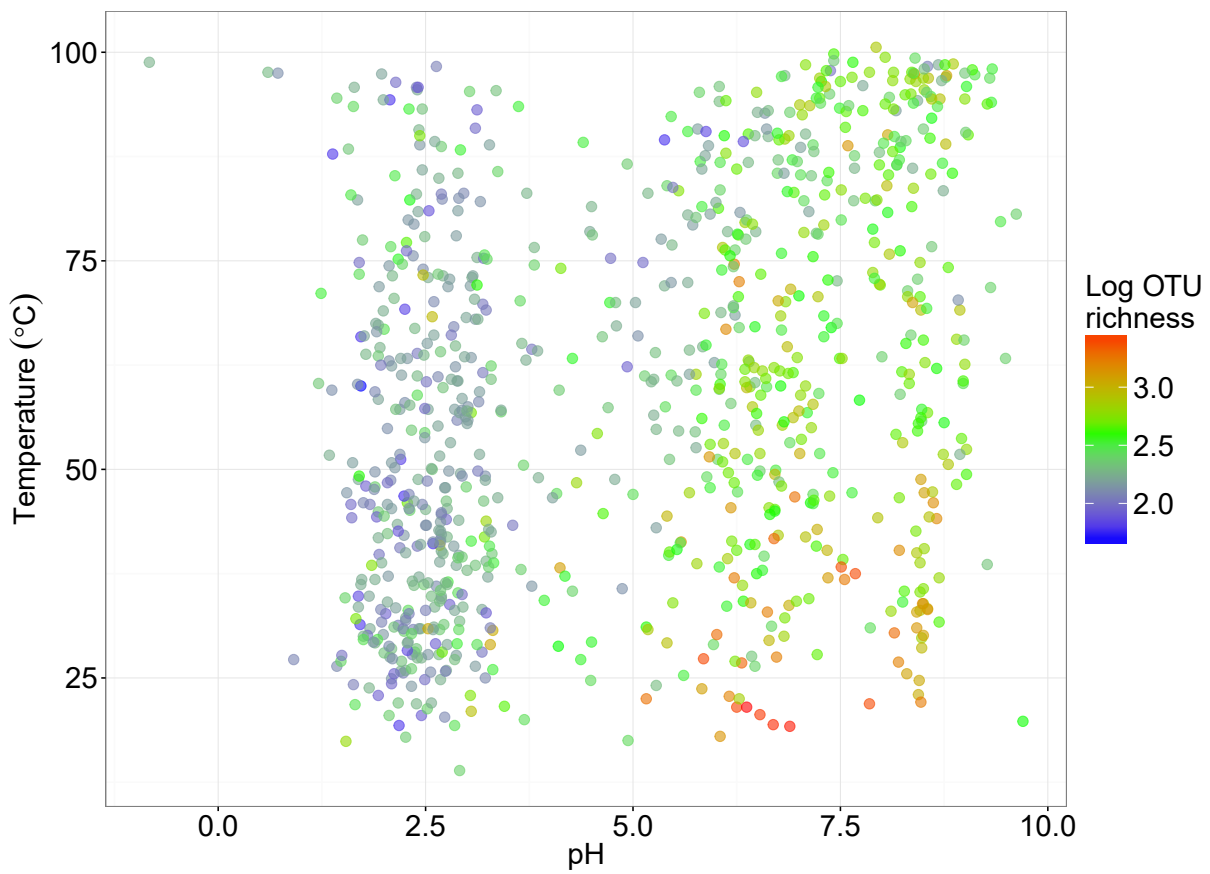

**Supplementary Fig. 2 | pH, temperature and alpha diversity scales.** A scatter plot of pH and temperature gradients for all springs sampled ( $n = 925$ ). The number of OTUs or richness is shown in colour (range: 49 – 2997, mean: 386, median: 247).

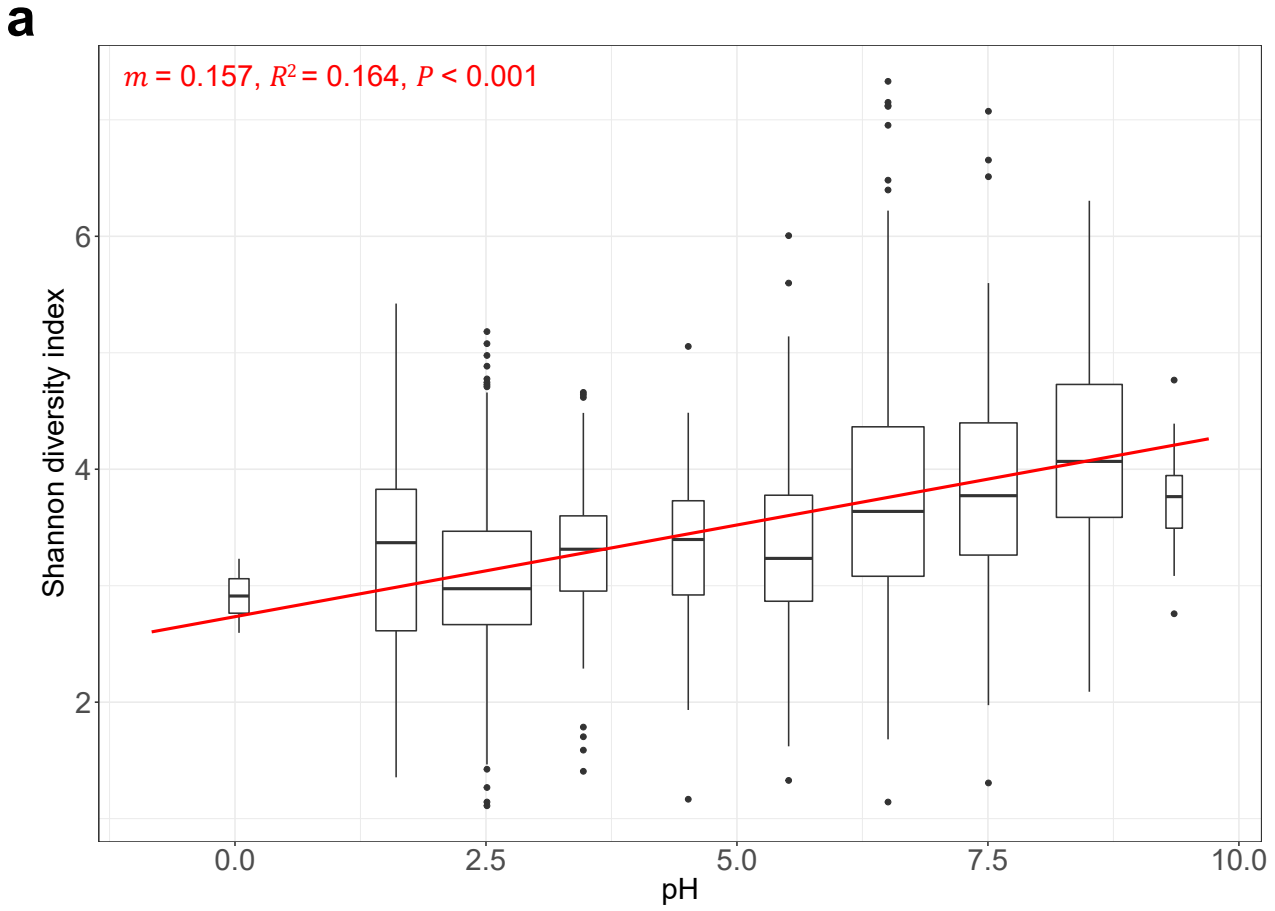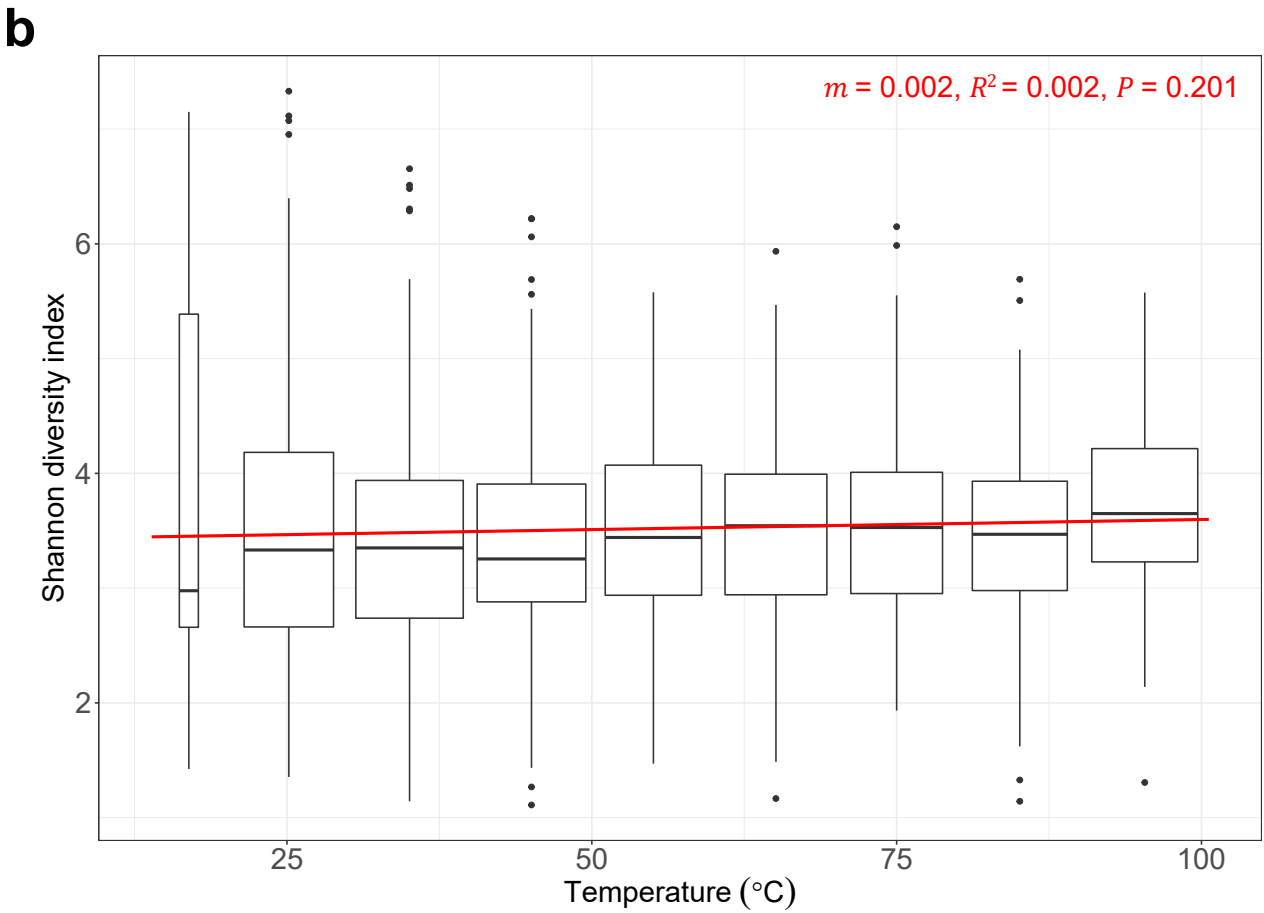

**Supplementary Fig. 3 | Alpha diversity against pH (a) and temperature (b).** Linear regression of Shannon index against each variable is shown in red ( $n = 925$ ).



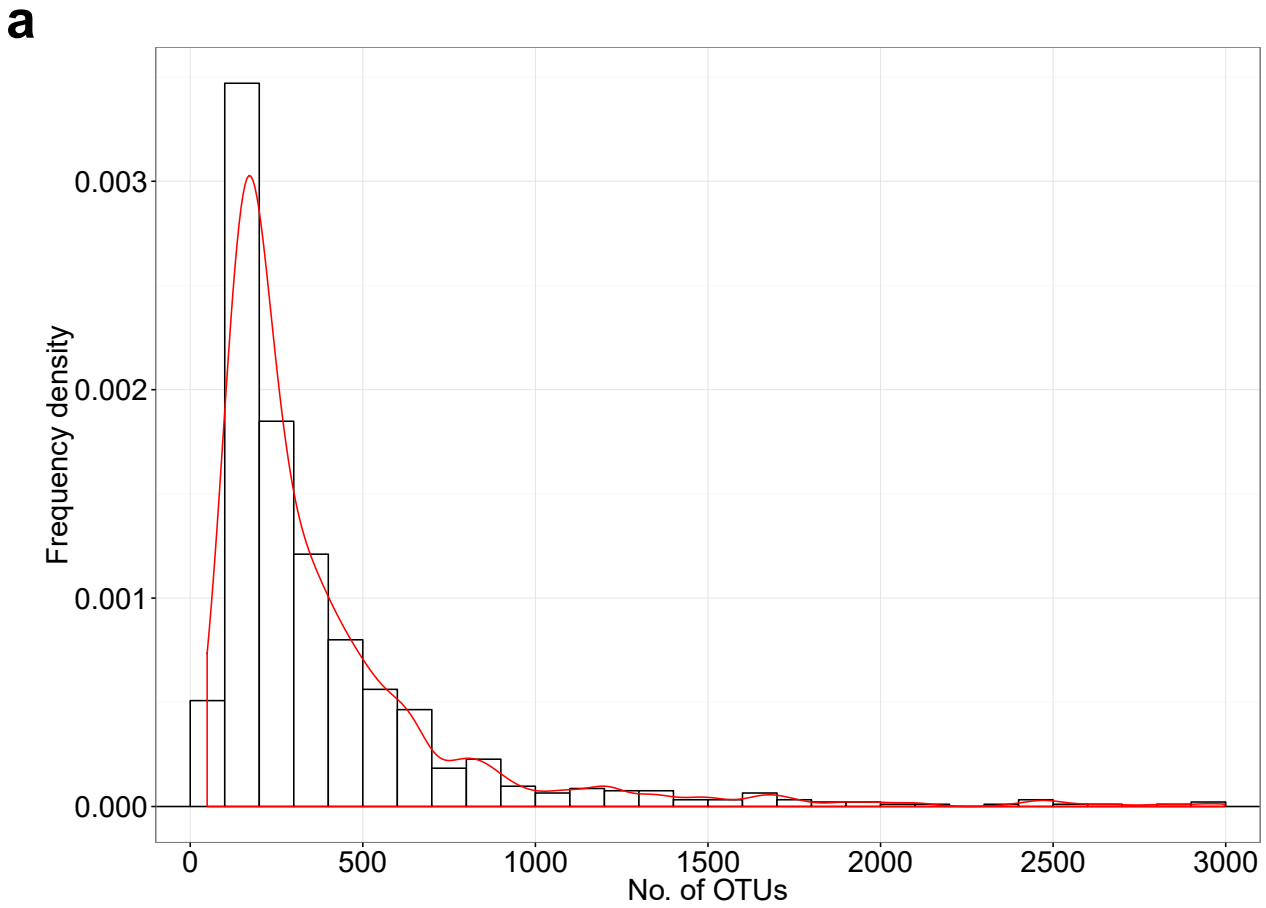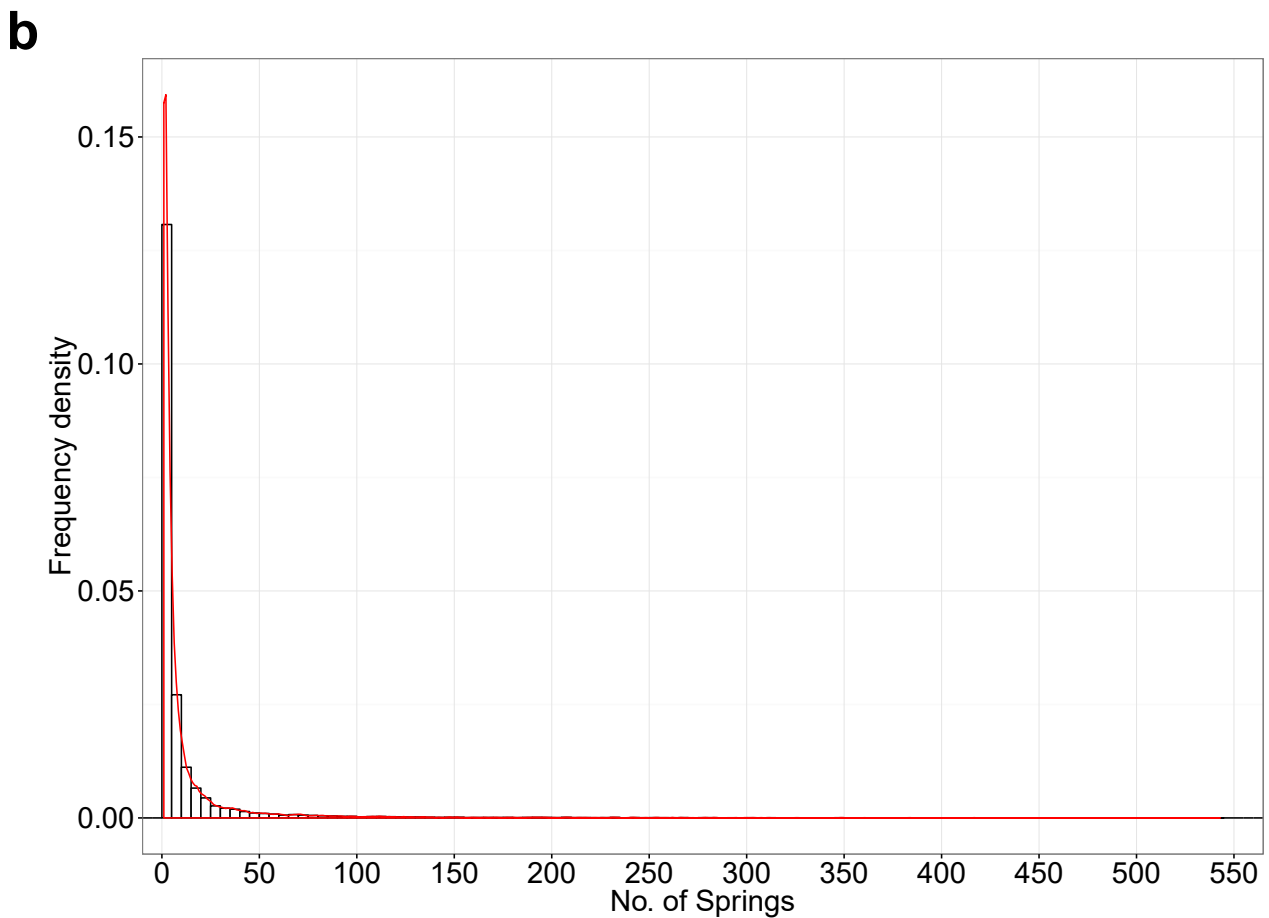

**Supplementary Fig. 4 | Quantity and distribution of OTUs across springs.**

(a) Histogram shows the number of OTUs found in each spring ( $n = 28,381$ , range: 49-2997, mean: 386, median: 247). (b) The distribution of each OTU across all springs ( $n = 925$ , range: 1-547, mean: 13, median: 3).

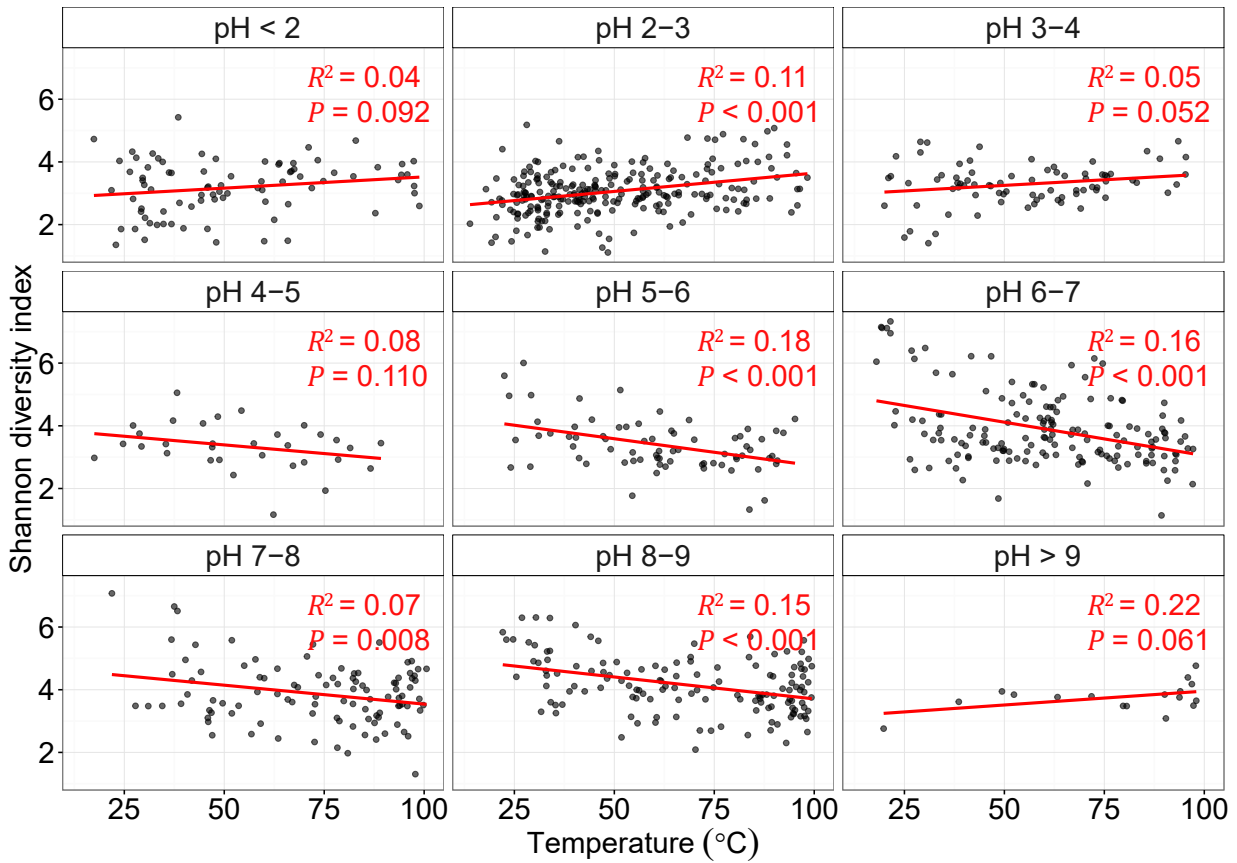

**Supplementary Fig. 5 | The relationship between alpha diversity and temperature.** Samples ( $n = 925$ ) are split into pH increments. Linear regression of each increment against Shannon diversity index is shown in red.

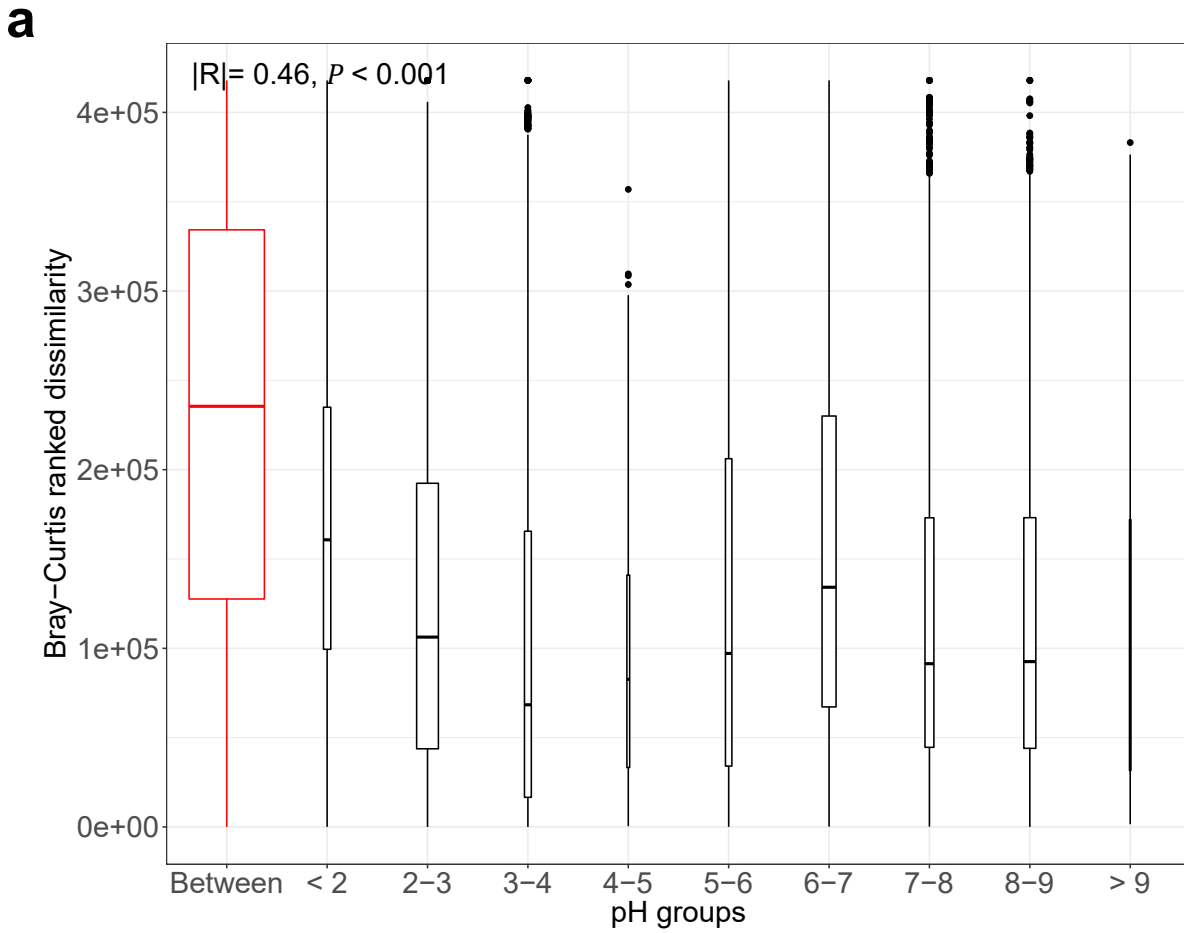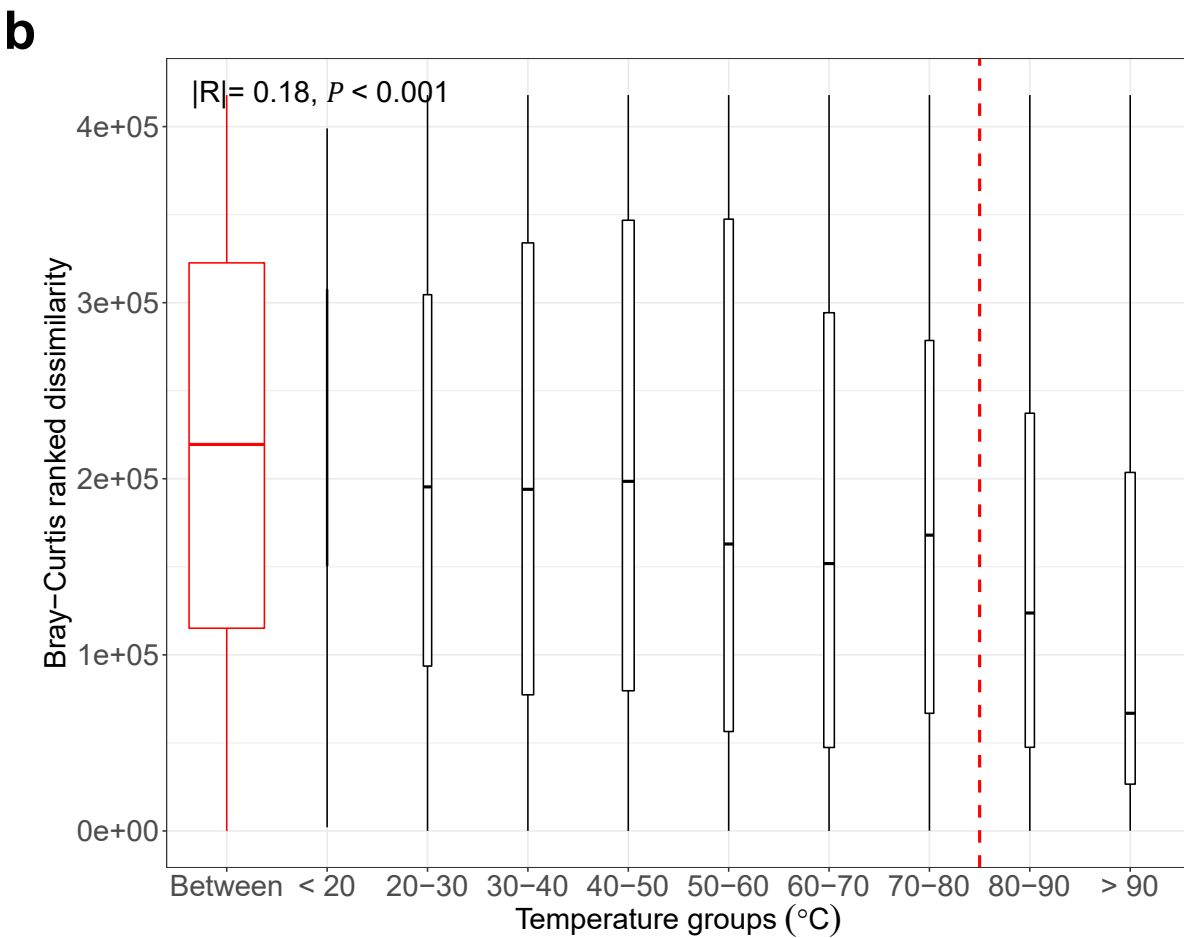

**Supplementary Fig. 6 | Analysis of similarities (ANOSIM:  $|R|$ ) of pH and temperature binned samples ( $n = 925$ ) against beta diversity.** The variation between pH (a) and temperature (b) groups is shown in red, with the variation within individual groups in black. The red dashed line in (b) refers to the greatest significant difference between individual temperature groups (Wilcoxon test:  $P < 2 \times 10^{-16}$ ;  $> 80$  °C).

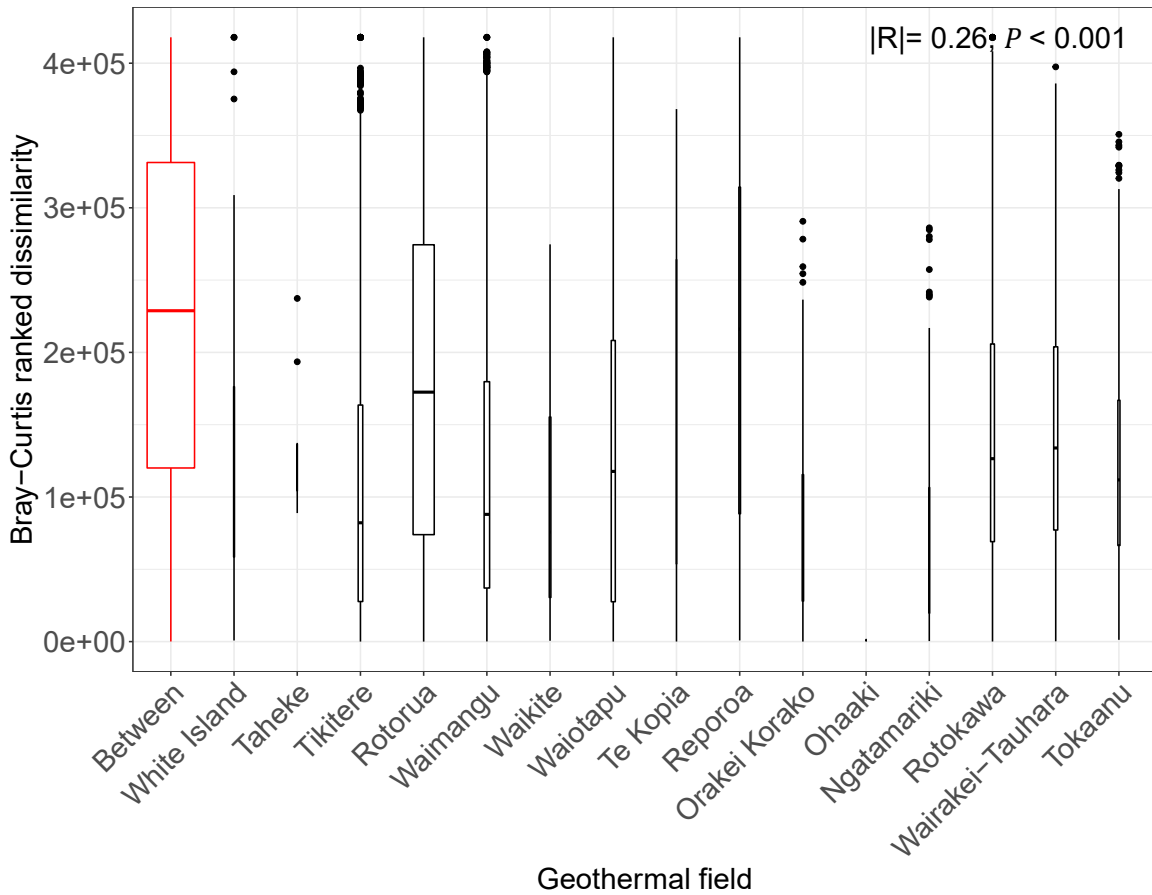

**Supplementary Fig. 7 | Analysis of similarities (ANOSIM: |R|) between geothermal fields and beta diversity.** The overall variation between fields is plotted in red, with the variation within each individual field in black. The width of each bar indicates the number of springs ( $n = 925$ ) per site. Two geothermal fields (Whangairorohea and Misc) had only one spring sampled and therefore are not shown in this analysis.

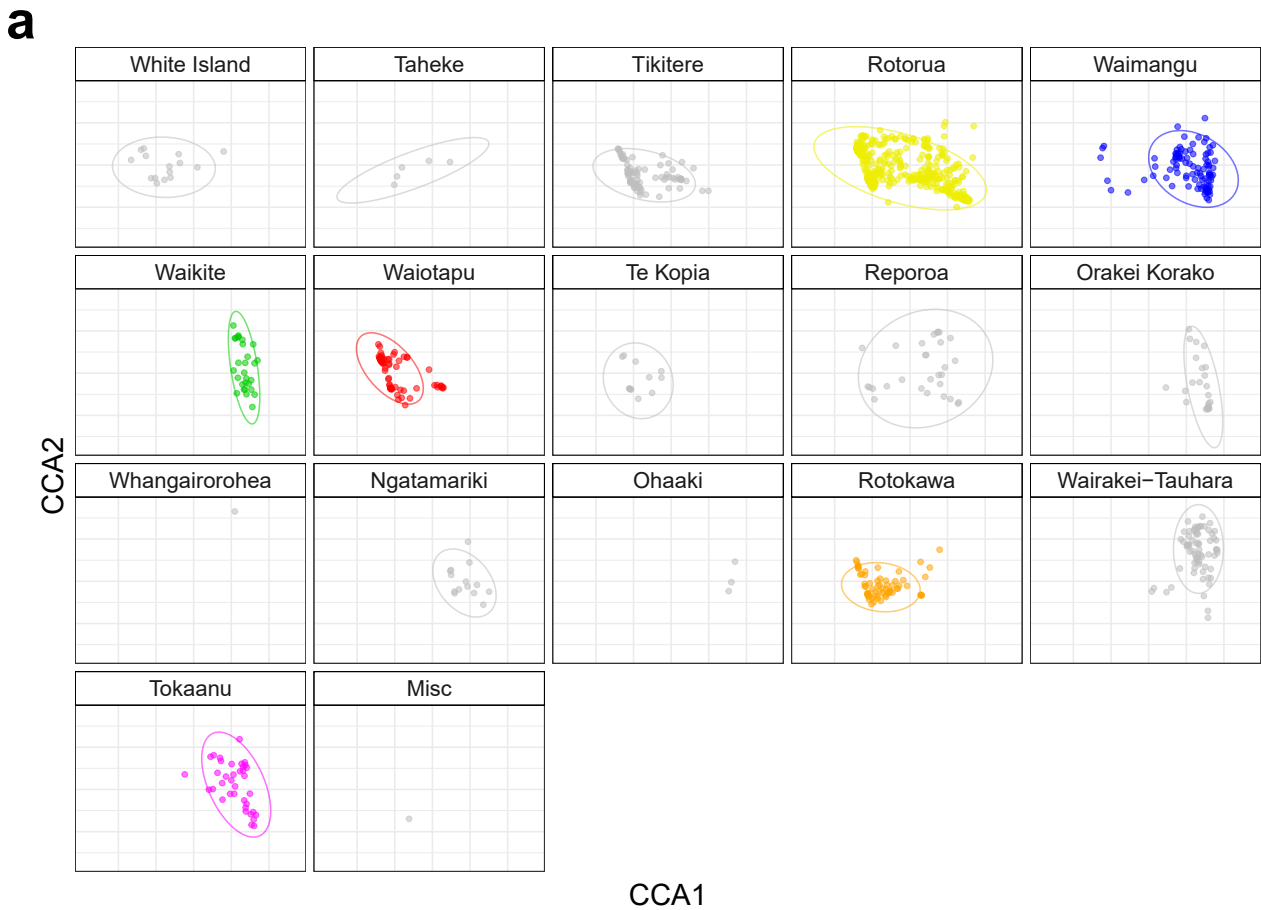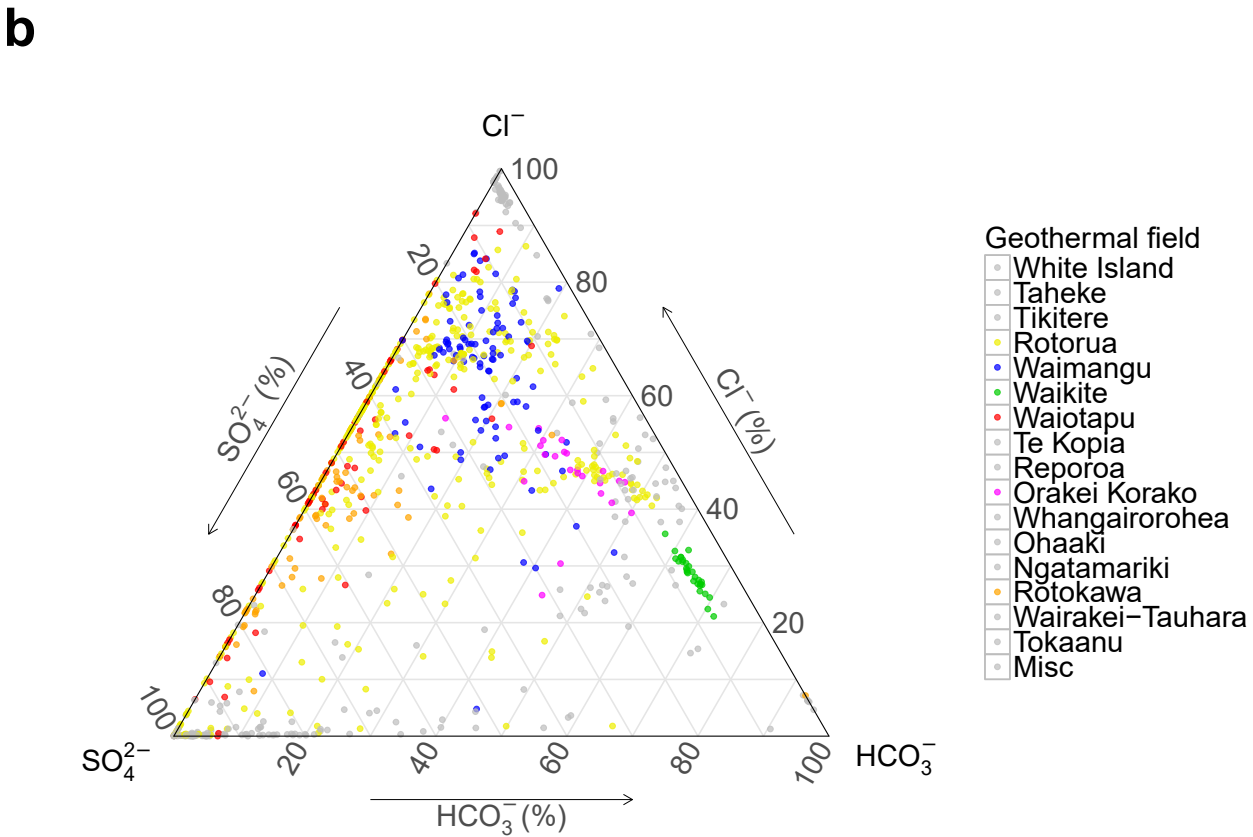

**Supplementary Fig. 8 | Constrained correspondence analysis (CCA) of geothermal fields and geochemical signatures.** (a) CCA ordination for each geothermal field – full model is shown in Fig. 3 ( $n = 923$ ). Ellipses are plotted as 95 % confidence intervals. (b) Ternary diagram of geochemical signatures for springs sampled ( $n = 923$ ). Points are colour-coded to geothermal fields shown individually in Fig. 3.

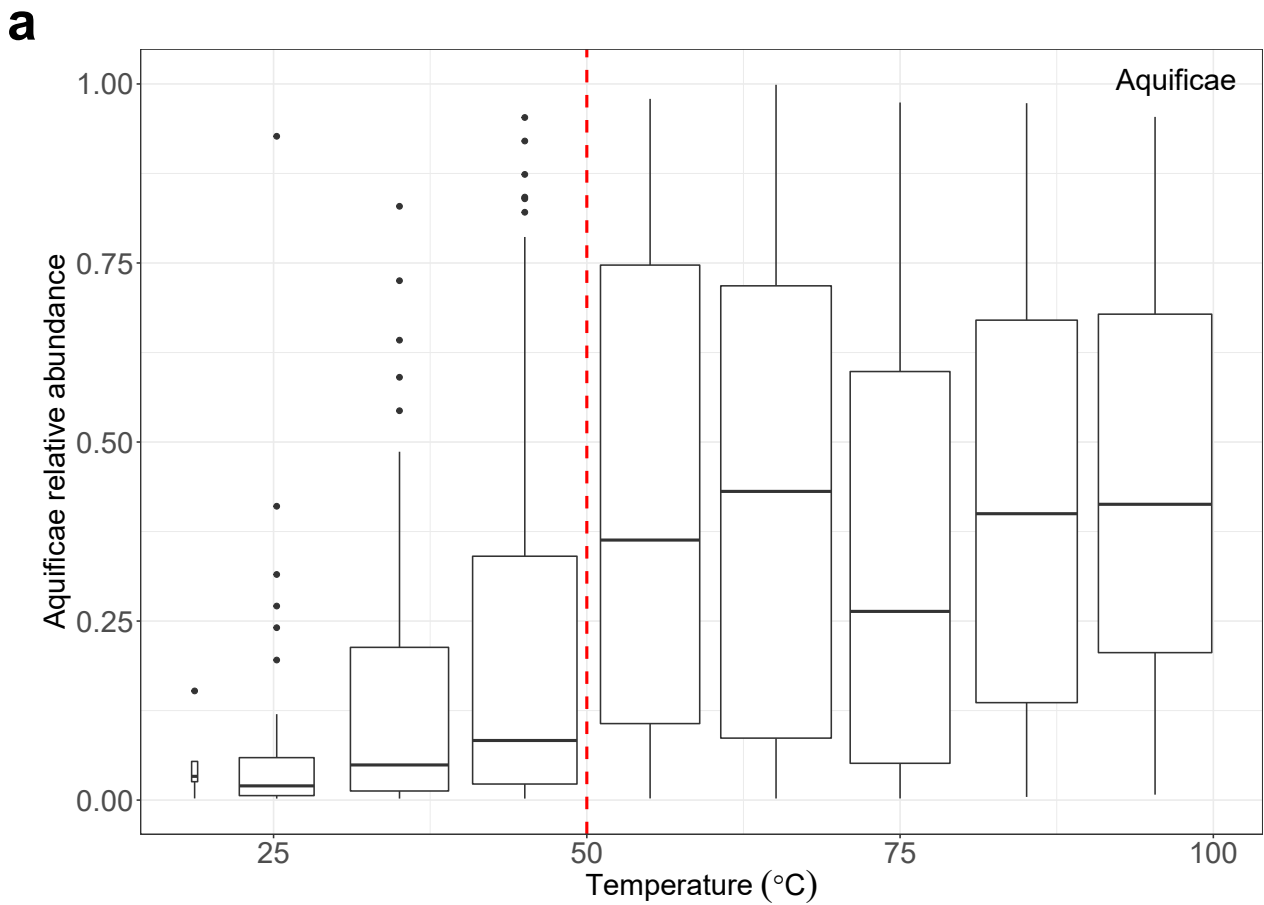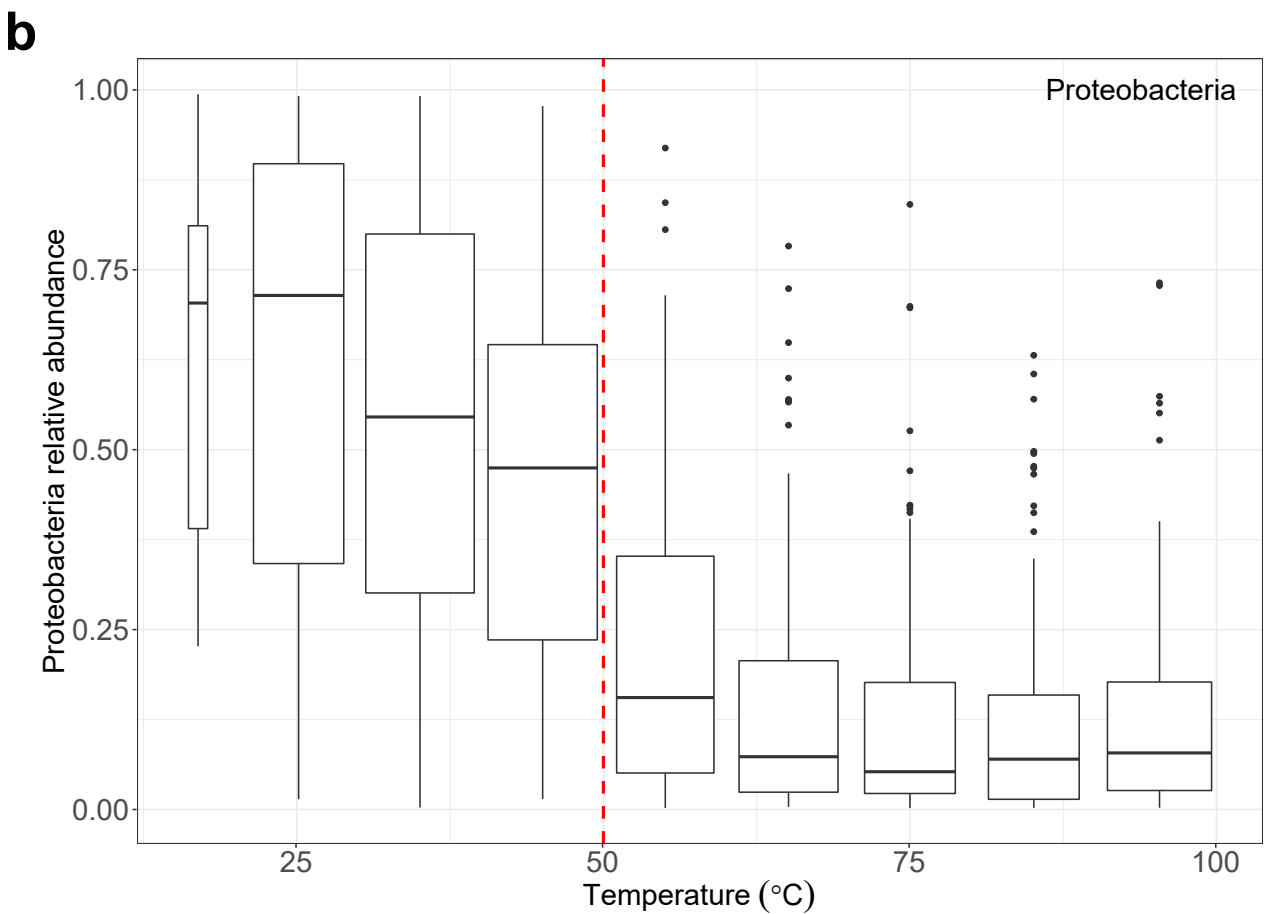

**Supplementary Fig. 9 | Relative abundance of Aquificae (a) and Proteobacteria (b) in each spring against temperature.** The boxplots are binned by 10 °C increments. The red dotted line marks a substantial change in abundance levels at 50 °C ( $n = 925$  for both plots).
